# Supplementary material
Source: HighWire-hosted journal article supplement (https://www.cmajopen.ca/highwire/filestream/89382/field_highwire_adjunct_files/0/2022-0072-at-1.pdf)
Supplement: 2022-0072-at-1.pdf [file 2022-0072-at-1.pdf]

Supplementary Table 1. **Socio-demographic and clinical data of patients presenting to the emergency department for an asthma-related visit by study site and for the pre-pandemic and pandemic periods.**

*Abbreviations.* CHUSJ = Centre Hospitalier Universitaire Sainte-Justine; MCH = Montreal Children's Hospital; IQR: interquartile range; ED: emergency Department

|                                                        | <b>All</b><br>January 1, 2017-June 30, 2021 |                  | <b>Pre-pandemic</b><br>January 1, 2017-March 31, 2020 |                 | <b>Pandemic</b><br>April 1, 2020-June 30, 2021 |                 |
|--------------------------------------------------------|---------------------------------------------|------------------|-------------------------------------------------------|-----------------|------------------------------------------------|-----------------|
|                                                        | CHUSJ<br>N=17 598                           | MCH<br>N=5 148   | CHUSJ<br>N=15 313                                     | MCH<br>N=4 095  | CHUSJ<br>N=2 285                               | MCH<br>N=1 053  |
| <b>Age, years, median (IQR)</b>                        | 2.6 (1.6, 4.7)                              | 2.0 (2.0, 7.0)   | 2.5 (1.6, 4.6)                                        | 3.0 (2.0, 7.0)  | 2.9 (1.8, 5.3)                                 | 4.0 (2.0, 7.0)  |
| <b>Male, n (%)</b>                                     | 11 015 (62.6)                               | 3241 (63.0)      | 9529 (62.2)                                           | 2556 (62.4)     | 1486 (65.0)                                    | 685 (65.1)      |
| <b>ED triage level, n (%)</b>                          |                                             |                  |                                                       |                 |                                                |                 |
| 1                                                      | 157 (0.9)                                   | 4 (0.1)          | 138 (0.9)                                             | 1 (0.0)         | 19 (0.8)                                       | 3 (0.3)         |
| 2                                                      | 2 901 (16.5)                                | 451 (8.8)        | 2 428 (15.9)                                          | 288 (7.0)       | 473 (20.7)                                     | 163 (15.5)      |
| 3                                                      | 12 098 (68.7)                               | 3 903 (75.8)     | 10 695 (69.8)                                         | 3 210 (78.4)    | 1 403 (61.4)                                   | 693 (65.8)      |
| 4                                                      | 2 335 (13.3)                                | 557 (10.8)       | 1 965 (12.8)                                          | 428 (10.5)      | 370 (16.2)                                     | 129 (12.3)      |
| 5                                                      | 107 (0.6)                                   | 233 (4.5)        | 87 (0.6)                                              | 168 (4.1)       | 20 (0.9)                                       | 65 (6.2)        |
| <b>Length of stay in ED, median (IQR)</b>              | 4.9 (3.5, 6.8)                              | 4.6 (3.2, 6.5)   | 4.9 (3.5, 6.8)                                        | 4.6 (3.3, 6.6)  | 4.8 (3.5, 6.6)                                 | 4.5 (3.1, 6.3)  |
| <b>Hospitalizations, n (%)</b>                         | 1 824 (10.4)                                | 118 (2.3)        | 1 588 (10.4)                                          | 79 (1.9)        | 236 (10.3)                                     | 39 (3.7)        |
| <b>Length of stay of hospitalization, median (IQR)</b> | 2.0 (1.0, 3.0)                              | 2.5 (2.0, 4.0)   | 2.0 (1.0, 3.0)                                        | 3.0 (2.0, 4.0)  | 2.0 (1.0, 3.0)                                 | 2.0 (2.0, 3.0)  |
| <b>Admission to ICU, n (%)</b>                         | 295 (1.7)                                   | 42 (0.8)         | 244 (1.6)                                             | 9 (0.2)         | 51 (2.2)                                       | 33 (3.1)        |
| <b>Canadian Index of Multiple Deprivation</b>          | missing<br>n=144                            | missing<br>n=110 | missing<br>n=118                                      | missing<br>n=84 | missing<br>n=26                                | missing<br>n=26 |
| <b>Residential instability quintiles, n (%)</b>        |                                             |                  |                                                       |                 |                                                |                 |
| Quintile 1                                             | 1850 (10.6)                                 | 709 (14.1)       | 1629 (10.6)                                           | 572 (14.0)      | 221 (9.7)                                      | 137 (13.0)      |
| Quintile 2                                             | 1625 (9.3)                                  | 532 (10.6)       | 1423 (9.3)                                            | 415 (10.1)      | 202 (8.8)                                      | 117 (11.1)      |
| Quintile 3                                             | 2088 (12.0)                                 | 589 (11.7)       | 1822 (11.9)                                           | 453 (11.1)      | 266 (11.6)                                     | 136 (12.9)      |
| Quintile 4                                             | 3032 (17.4)                                 | 974 (19.3)       | 2645 (17.3)                                           | 777 (19.0)      | 387 (16.9)                                     | 197 (18.7)      |
| Quintile 5                                             | 8859 (50.8)                                 | 2234 (44.3)      | 7676 (50.1)                                           | 1795 (43.8)     | 1183 (51.8)                                    | 440 (41.8)      |
| <b>Economic dependency quintiles, n (%)</b>            |                                             |                  |                                                       |                 |                                                |                 |
| Quintile 1                                             | 3684 (21.1)                                 | 986 (19.6)       | 3197 (20.9)                                           | 799 (19.5)      | 487 (21.3)                                     | 187 (17.8)      |
| Quintile 2                                             | 3486 (20.0)                                 | 1001 (19.9)      | 3034 (19.8)                                           | 783 (19.1)      | 452 (19.8)                                     | 218 (20.7)      |
| Quintile 3                                             | 4295 (24.6)                                 | 1216 (24.1)      | 3765 (24.6)                                           | 989 (24.2)      | 530 (23.2)                                     | 227 (21.6)      |

Appendix 1, as supplied by the authors. Appendix to: Chelabi K, Osmanlliu E, Gravel J, et al. The effect of the COVID-19 pandemic on pediatric asthma-related emergency department visits and hospital admissions in Montréal, Quebec: a retrospective cohort study. *CMAJ Open* 2023. doi:10.9778/cmajo.2022-0072. Copyright © 2023 The Author(s) or their employer(s). To receive this resource in an accessible format, please contact us at [cmajgroup@cmaj.ca](mailto:cmajgroup@cmaj.ca).

|                                                    |             |             |             |             |            |            |
|----------------------------------------------------|-------------|-------------|-------------|-------------|------------|------------|
| Quintile 4                                         | 3614 (20.7) | 1146 (22.7) | 3144 (20.5) | 903 (22.1)  | 470 (20.6) | 243 (23.1) |
| Quintile 5                                         | 2375 (13.6) | 689 (13.7)  | 2055 (13.4) | 537 (13.1)  | 320 (14.0) | 152 (14.4) |
| <b>Ethno-cultural composition quintiles, n (%)</b> |             |             |             |             |            |            |
| Quintile 1                                         | 1295 (7.4)  | 235 (4.7)   | 1130 (7.4)  | 179 (4.4)   | 165 (7.2)  | 56 (5.3)   |
| Quintile 2                                         | 2108 (12.1) | 413 (8.2)   | 1821 (11.9) | 329 (8.0)   | 287 (12.6) | 84 (8.0)   |
| Quintile 3                                         | 2640 (15.1) | 877 (17.4)  | 2332 (15.2) | 685 (16.7)  | 308 (13.5) | 192 (18.2) |
| Quintile 4                                         | 4811 (27.6) | 1812 (36.0) | 4166 (27.2) | 1448 (35.4) | 645 (28.2) | 364 (34.6) |
| Quintile 5                                         | 6600 (37.8) | 1701 (33.8) | 5746 (37.5) | 1370 (33.5) | 857 (31.4) | 331 (31.4) |
| <b>Situational vulnerability quintiles, n (%)</b>  |             |             |             |             |            |            |
| Quintile 1                                         | 2920 (16.7) | 1107 (22.0) | 2533 (16.5) | 888 (21.7)  | 387 (16.9) | 219 (20.8) |
| Quintile 2                                         | 3614 (20.7) | 994 (19.7)  | 3148 (20.6) | 793 (19.4)  | 466 (20.4) | 201 (19.1) |
| Quintile 3                                         | 3888 (22.3) | 1111 (22.1) | 3402 (22.2) | 886 (21.6)  | 486 (21.3) | 225 (21.4) |
| Quintile 4                                         | 4277 (24.5) | 1111 (22.1) | 3729 (24.4) | 876 (21.4)  | 548 (24.0) | 235 (22.3) |
| Quintile 5                                         | 2755 (15.8) | 715 (14.2)  | 2383 (15.6) | 568 (13.9)  | 372 (16.3) | 147 (14.0) |

Appendix 1, as supplied by the authors. Appendix to: Chelabi K, Osmanlliu E, Gravel J, et al. The effect of the COVID-19 pandemic on pediatric asthma-related emergency department visits and hospital admissions in Montréal, Quebec: a retrospective cohort study. *CMAJ Open* 2023. doi:10.9778/cmajo.2022-0072. Copyright © 2023 The Author(s) or their employer(s). To receive this resource in an accessible format, please contact us at [cmajgroup@cmaj.ca](mailto:cmajgroup@cmaj.ca).
